# Supplementary material for: Optimising Soy and Pea Protein Gelation to Obtain Hydrogels Intended as Precursors of Food-Grade Dried Porous Materials
Source: MDPI journal article supplement (doi:10.3390/gels9010062), 2023-01-12
Supplement: s1 [file s1]

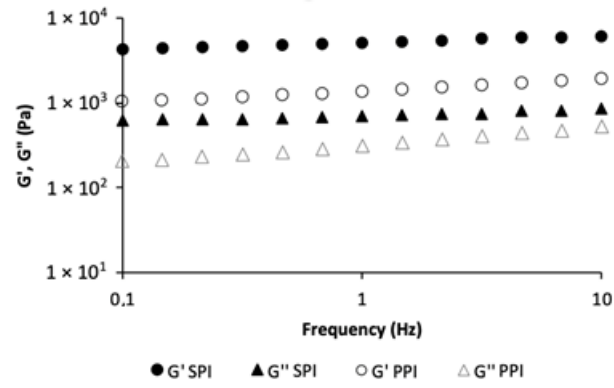

**Figure S1.** Elastic ( $G'$ ) and viscous ( $G''$ ) modulus of soy (SPI) and pea protein isolate (PPI) hydrogels obtained from 20% (w/w) protein solutions.

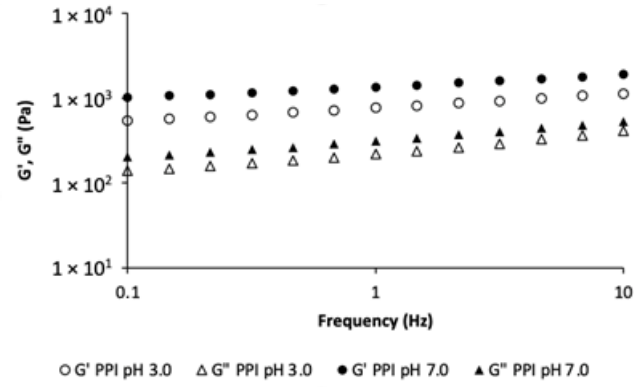

**Figure S2.** Elastic ( $G'$ ) and viscous ( $G''$ ) modulus of pea protein isolate (PPI) hydrogels obtained from 20% (w/w) protein solutions at pH 3.0 and 7.0.

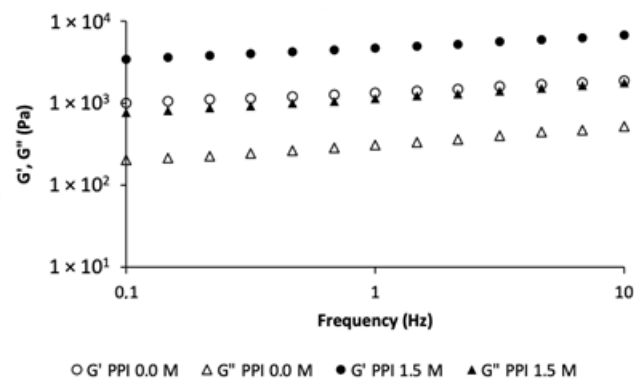

**Figure S3.** Elastic ( $G'$ ) and viscous ( $G''$ ) modulus of pea protein isolate (PPI) hydrogels obtained from 20% (w/w) protein solutions at 0.0 and 1.5 M ionic strength.
